# Supplementary material for: Diagnostic efficacy of cone beam computed tomography in paediatric dentistry: a systematic review
Source: PubMed Central journal article supplement (PMC7415745; doi:10.1007/s40368-019-00504-x), 2019-12-19
Supplement: 40368_2019_504_MOESM4_ESM.pdf [file 40368_2019_504_MOESM4_ESM.pdf]

ONLINE RESOURCE 4: CASE REPORT PUBLICATIONS CONTAINING FEWER THAN FIVE PAEDIATRIC CASES, LISTED ACCORDING TO THE CLINICAL CONTEXTS AND WITH A BRIEF INDICATION OF THE ROLE OF CBCT DEMONSTRATED IN THE REPORT.

| Clinical contexts        | Publication                                                   | Role of CBCT                                                   |
|--------------------------|---------------------------------------------------------------|----------------------------------------------------------------|
| Caries                   | NONE                                                          |                                                                |
| Acute infections         | 605. Schulze et al. (2006)                                    | Imaging of the bony signs of osteomyelitis                     |
| Dental trauma            | 325. Cohenca et al. (2007)                                    | Imaging of root fracture and luxation injuries                 |
|                          | 1677. Kleinbergen et al. (2011)                               | Imaging of a luxation injury                                   |
|                          | 1209. Bahadure (2013)                                         | Imaging of a post-trauma intruded incisor                      |
|                          | 1693. Ambu et al. (2013)                                      | Follow-up of replanted avulsed incisor                         |
|                          | 275. Pamboo et al. (2017)                                     | Imaging of a post-trauma intruded incisor                      |
|                          | 452. Stuehmer et al. (2008)                                   | Teeth displaced into facial soft tissues                       |
|                          | 1721. Christou et al. (2014)                                  | Mandibular fracture                                            |
| Dental anomalies         | 12. Sahai et al. (2011)                                       | Tooth malformation and eruptive disturbance                    |
|                          | 998. Canoglu et al. (2012)                                    | Management of unerupted macrodonts                             |
|                          | 1031. Hashim (2013)                                           | Management of unerupted primary molar                          |
|                          | 255. Lucey et al. (2009)                                      | 3D model of geminated tooth used in treatment planning         |
|                          | 440. Laffranchi et al. (2010a)                                | Imaging of ectopic maxillary canine                            |
|                          | 1645. Gruszka et al. (2014)                                   | Imaging of ectopic mandibular canine                           |
|                          | 1607. Nurko (2010)                                            | Imaging of unerupted maxillary incisor and supernumerary tooth |
|                          | 1698. Nematollahi et al. (2013)                               | Imaging of unerupted maxillary incisor and odontome            |
|                          | 257. Brauer (2011)                                            | Imaging of multiple supernumerary teeth for surgical planning  |
|                          | 430. Gurgel et al. (2012)                                     | Imaging of multiple supernumerary teeth for surgical planning  |
|                          | 1702. Merrett et al. (2013)                                   | Imaging of supernumerary teeth and treatment planning          |
| 478. Omami et al. (2015) | Imaging of multiple supernumerary teeth for surgical planning |                                                                |

|                                       |                                                                      |
|---------------------------------------|----------------------------------------------------------------------|
| 425. Al-Sehaibany et al. (2016)       | Imaging of supernumerary teeth for surgical planning                 |
| 464. Jeremias et al. (2016)           | Imaging of supernumerary teeth for surgical planning                 |
| 432. Sane et al. (2017)               | Imaging of supernumerary teeth for surgical planning                 |
| 1146. Wang et al. (2017)              | Navigation-guided extraction of impacted supernumerary teeth         |
| 261. Gandiban and Ramakrishnan (2014) | Value in root canal identification in geminated tooth                |
| 541. Ozcan et al. (2016)              | Imaging of primary tooth root canal anomaly – no treatment done      |
| 1674. Yang et al. (2011)              | Value of imaging morphology of fused tooth                           |
| 1037. Kim (2013)                      | Value of imaging morphology of fused tooth                           |
| 326. Cho et al. (2014)                | Value of imaging morphology of fused tooth                           |
| 1703. Patel (2010)                    | Value of imaging in endodontic management of dens invaginatus        |
| 327. Kaneko et al. (2011)             | Value of imaging in management of dens invaginatus                   |
| 717. Narayana et al. (2012)           | Value of imaging in management of dens invaginatus                   |
| 1704. Vier-Pelisser et al. (2012)     | Value of imaging in management of dens invaginatus                   |
| 594. Cohenca and Berg (2013)          | Value of imaging in management of dens invaginatus                   |
| 1166. Kato (2013)                     | Value of imaging in management of dens invaginatus                   |
| 506. Ceyhanli et al. (2014)           | Value of imaging in endodontic management of dens invaginatus        |
| 1710. Teixido et al. (2014)           | Value of imaging in endodontic management of dens invaginatus        |
| 1038. Vier-Pelisser et al. (2014)     | Value of imaging in endodontic management of dens invaginatus        |
| 719. Nosrat and Schneider (2015)      | Value of imaging in endodontic management of dens invaginatus        |
| 551. Pallivathukal et al. (2015)      | Value of imaging in endodontic management of dens invaginatus        |
| 1739. Wall et al. (2015)              | Value of imaging in endodontic management of dens invaginatus        |
| 645. Zoya et al. (2015)               | Value of imaging in endodontic management of dens invaginatus        |
| 1365. Agrawal et al. (2016)           | Value of imaging in endodontic management of dens invaginatus        |
| 1126. Clarke et al. (2016)            | Value of imaging in endodontic management of dens invaginatus        |
| 489. Mittal et al. (2016)             | Value of imaging in endodontic management of dens invaginatus        |
| 715. Sharma, S. et al (2014)          | Endodontic management of dilacerated tooth                           |
| 1165. Yue and Kim (2016)              | Endodontic management of molar in case of Molar-Incisor Malformation |
| 483. Esmaeilzadeh et al. (2016)       | Imaging of unerupted dilacerated tooth + talon cusp                  |
| 1672. Dharmani et al. (2014)          | Imaging of talon cusp and dens invaginatus                           |

|                         |                                       |                                                                                                                |
|-------------------------|---------------------------------------|----------------------------------------------------------------------------------------------------------------|
|                         | 593. Kfir et al. (2013)               | 3D printed model in managing dens invaginatus                                                                  |
|                         | 1130. Saini et al. (2008)             | Detection of enamel pearls                                                                                     |
|                         | 1133. Marques-da-Silva et al. (2010)  | Detection and imaging of taurodonts                                                                            |
|                         | 1725. Borges et al. (2014)            | Detection and imaging of taurodonts                                                                            |
|                         | 1658. Radwan and Kim (2014)           | Detection and imaging of taurodonts                                                                            |
|                         | 1722. Kobayashi et al. (2013)         | Imaging of complex odontome                                                                                    |
|                         |                                       |                                                                                                                |
| Developmental disorders | 20. Reynolds et al. (2011)            | 3D models to assess growth of jaws                                                                             |
|                         | 612. Holst et al. (2009)              | Imaging and monitoring of cherubism                                                                            |
|                         | 1694. Laffranchi et al. (2010b)       | Imaging of pyknodysostosis                                                                                     |
|                         | 1699. Ghoneima et al. (2013)          | Imaging of trichorhinophalangeal syndrome, type Ia                                                             |
|                         |                                       |                                                                                                                |
| Pathological conditions | 91. Salehinejad et al. (2013)         | Ameloblastic fibro-dentinoma                                                                                   |
|                         | 93. de Souza Tolentino et al. (2010)  | Ameloblastic fibro-odontoma                                                                                    |
|                         | 740. Hunter et al. (2012)             | Ameloblastic fibro-odontoma: "extent of the lesion and its effects on adjacent structures"                     |
|                         | 69. Lucio et al. (2013)               | Ameloblastic fibro-odontoma: "extent of bone involvement"                                                      |
|                         | 92. Augello et al. (2017)             | Ameloblastic fibro-odontoma: "localisation of lesion and preservation of vital structures"                     |
|                         | 94. O'Connell et al. (2014)           | Amelogenesis imperfecta associated with dental follicular-like hamartomas and generalised gingival enlargement |
|                         | 126. Friedrich et al. (2012)          | Anterior mandibular lingual bone depression (Stafne)                                                           |
|                         | 222. Boffano et al. (2012)            | Buccal bifurcation cyst                                                                                        |
|                         | 244. Chindasombatjaroen et al. (2012) | Calcifying cystic odontogenic tumour: extent and relationships of lesion                                       |
|                         | 254. Burak et al. (2018)              | Coronoid hyperplasia                                                                                           |
|                         | 272. Vasconcelos et al. (2016)        | Invasive cervical resorption                                                                                   |
|                         | 1693. Ambu et al. 2017                | Inflammatory external root resorption                                                                          |

|            |                                     |                                                                      |
|------------|-------------------------------------|----------------------------------------------------------------------|
|            | 1414. Maini (2008)                  | Differentiating internal and external resorption                     |
|            | 1738. Allison and Garlington (2017) | Dentigerous cyst                                                     |
|            | 312. Pinheiro et al. (2013)         | Giant cell lesions                                                   |
|            | 1681. Orhan et al. (2012)           | Fibrodysplasia ossificans progressiva                                |
|            | 1338. Brauer et al. (2013)          | Odontogenic keratocyst                                               |
|            | 70. Pontual et al. (2014)           | Osteoblastoma:                                                       |
|            |                                     |                                                                      |
| Other uses | 983. Mischkowski et al. (2007)      | Surgical navigation using CBCT (foreign bodies; odontoma)            |
|            | 801. Sakabe et al. (2006)           | TMJ bony abnormality imaging                                         |
|            | 213. Keightley et al. (2010)        | 3D model of tooth used for autotransplantation                       |
|            | 216. Lee.et al. (2014)              | 3D model of tooth used for autotransplantation                       |
|            | 1199. Park et al. (2014)            | 3D model of tooth used for autotransplantation                       |
|            | 217. Verweij et al. (2016)          | 3D model of tooth used for autotransplantation                       |
|            | 18. Nadig et al. (2016)             | 3D model of tooth used for autotransplantation                       |
|            | 1407. Verweij et al. (2017)         | 3D model of tooth used for autotransplantation                       |
|            | 218. Kim et al. (2017)              | 3D model of tooth used for autotransplantation                       |
|            | 22. EzEldeen et al. (2015)          | Measurement of dental hard tissue volume in regenerative endodontics |
|            | 535. Adolphs et al. (2013)          | Craniofacial surgery planning                                        |
|            | 888. Mehrdad et al. (2013)          | Evaluation of pulpotomy outcomes in primary molar                    |
